# Supplementary material for: Improvement of Mucosal Lesion Diagnosis with Machine Learning Based on Medical and Semiological Data: An Observational Study
Source: MDPI journal article supplement (doi:10.3390/jcm11216596), 2022-11-07
Supplement: s1 [file s1]

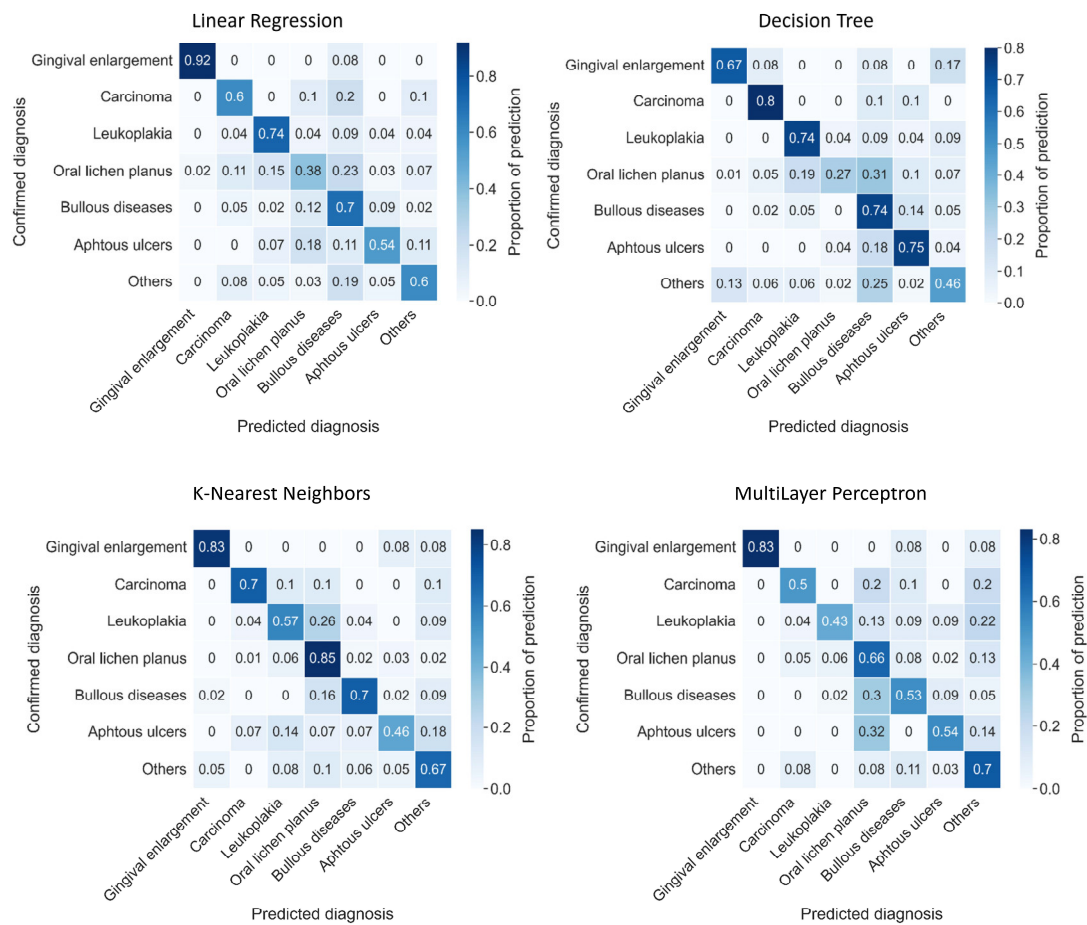

**Figure S1:** Confusion matrices for the different machine learning models tested on the test dataset. The confusion matrix describes the performance of the difference classifier models on the test dataset.

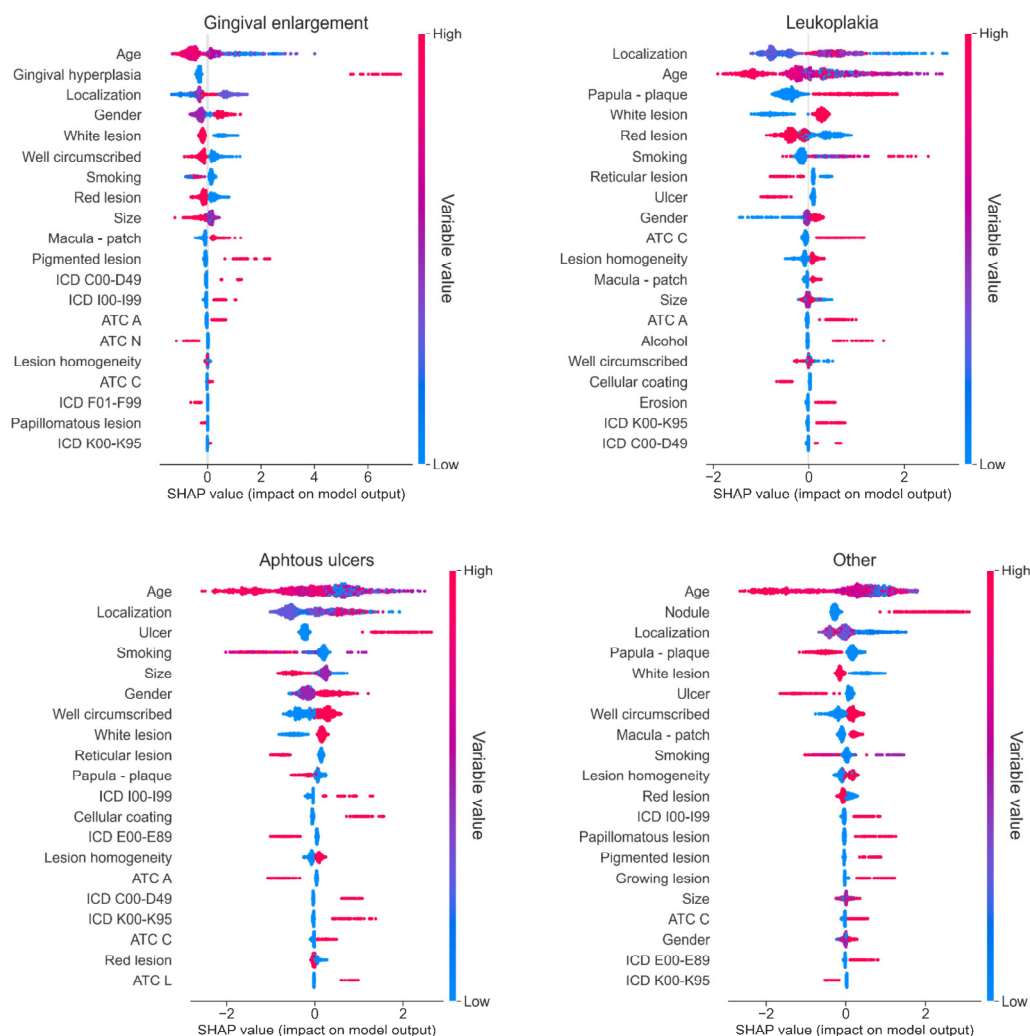

**Figure S2:** Feature importance for each diagnostic prediction. Each point on the summary plot is a SHAP value for a feature and an instance. The position on the y-axis is determined by the feature and on the x-axis by the SHAP value. The color represents the value of the feature from low to high. Overlapping points are jittered in y-axis direction, so we get a sense of the distribution of the SHAP values per feature. The features are ordered according to their importance.
